# Supplementary material for: Regulation of fibrinolytic protein adsorption on polyurethane surfaces by modification with lysine-containing copolymers
Source: Royal Society of Chemistry journal article supplement (doi:10.1039/c3py00710c), 2013-01-01
Supplement: c3py00710c.pdf [file c3py00710c.pdf]

## Supplementary information

### **Regulation of fibrinolytic protein adsorption on polyurethane surfaces by modification with lysine-containing copolymers**

Zengchao Tang, Xiaoli Liu, Yafei Luan, Wei Liu, Zhaoqiang Wu, Dan Li\* and Hong Chen\*

Jiangsu Key Laboratory of Advanced Functional Polymer Design and Application,  
The Key Lab of Health Chemistry and Molecular Diagnosis of Suzhou, College of  
Chemistry, Chemical Engineering and Materials Science, Soochow University, 199  
Ren'ai Rd., Suzhou 215123, Jiangsu, P.R. China

\*To whom correspondence should be addressed. E-mail: [chenh@suda.edu.cn](mailto:chenh@suda.edu.cn) (H. Chen); [lidan@suda.edu.cn](mailto:lidan@suda.edu.cn) (D. Li). Fax: +86-512-65880583; Tel: +86-512- 65880827;

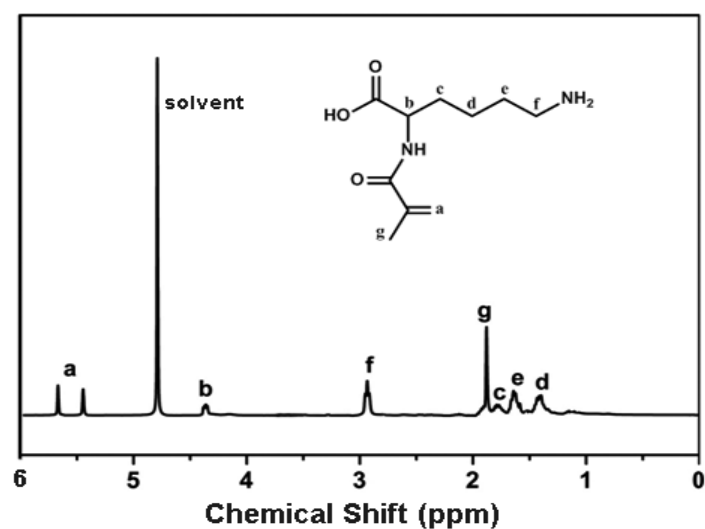

Figure S1.  $^1\text{H}$  NMR spectrum of the lysine monomer in  $\text{D}_2\text{O}$ .

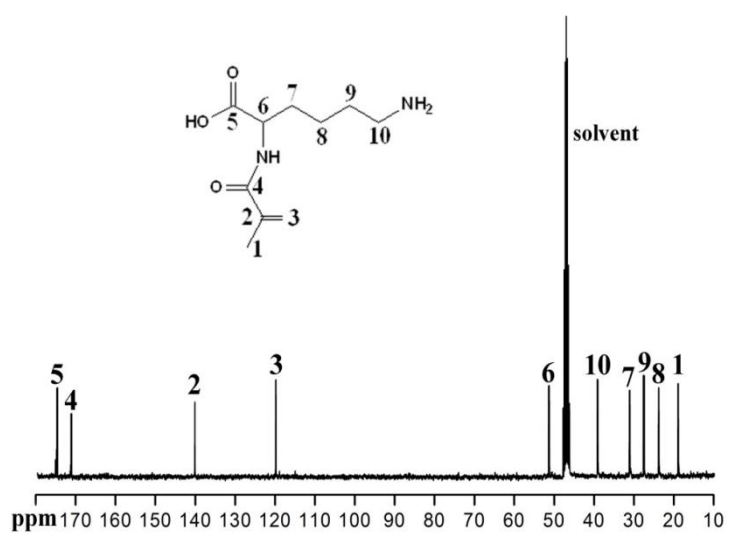

Figure S2.  $^{13}\text{C}$  NMR spectrum of lysine monomer in  $\text{methanol-}d_4$ .

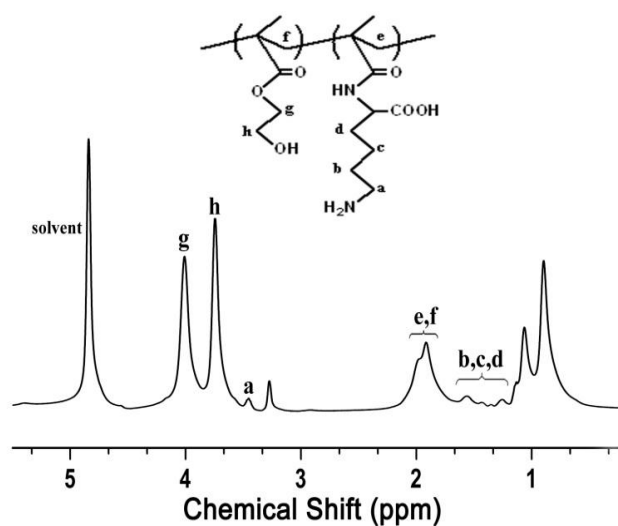

Figure S3.  $^1\text{H}$  NMR spectrum of the representative copolymer (P(HEMA-co-Lys)) in methanol- $d_4$ .

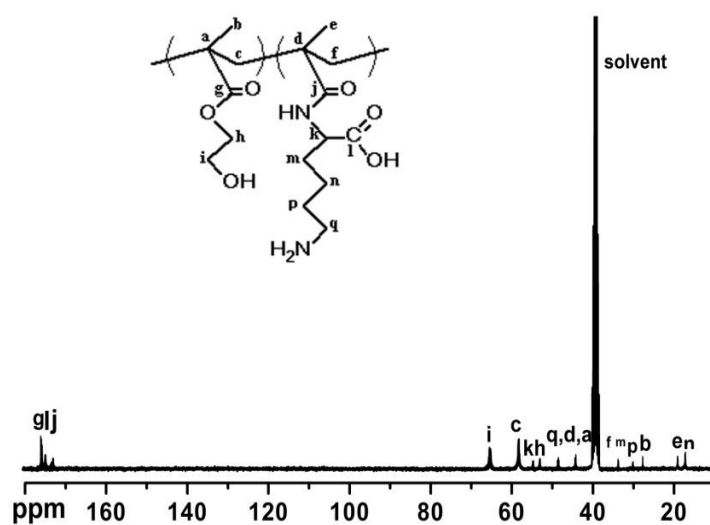

Figure S4.  $^{13}\text{C}$  NMR spectrum of the representative copolymer (P(HEMA-co-Lys)) in DMSO- $d_6$ .

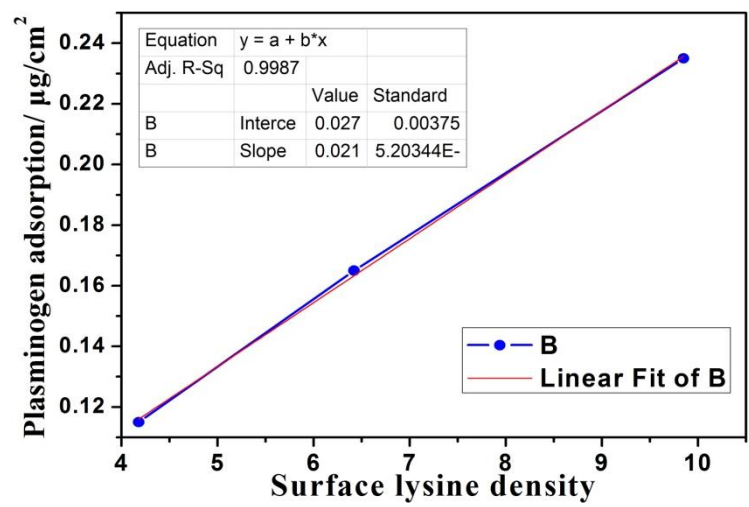

Figure S5. Relationship between surface lysine density and the corresponding amount of plasminogen adsorption.
